# Supplementary material
Source: Springer Nature journal article supplement (https://www.springermedizin.de/resource/supplementary/13256_2014_2909_MOESM2_ESM.pdf/9650806)

**A**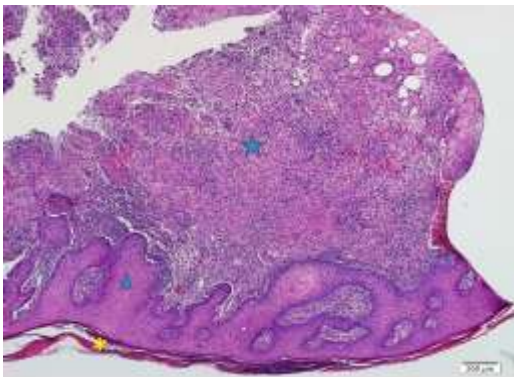**C**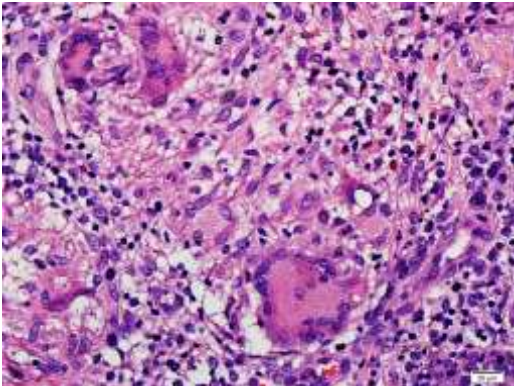**B**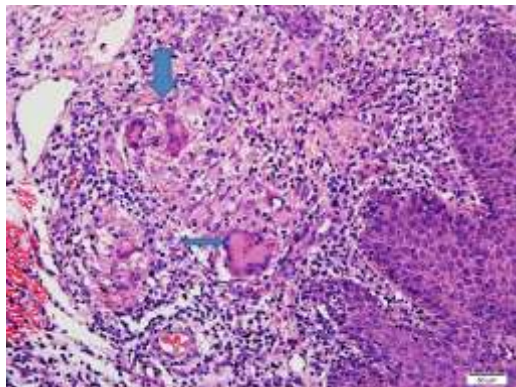**D**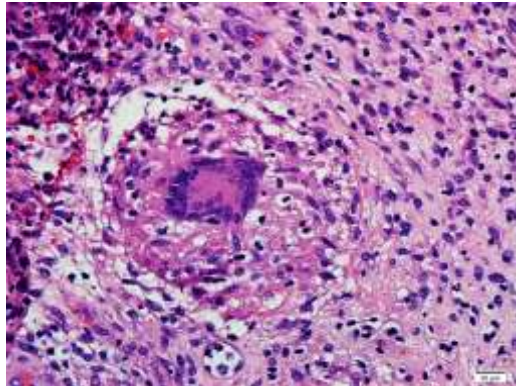

Supplement: MOESM2 [file 9650806]
